# Supplementary material
Source: Royal Society of Chemistry journal article supplement (doi:10.1039/d5dd00302d)
Supplement: d5dd00302d1.pdf [file d5dd00302d1.pdf]

## Supporting information for: Enhancing Predictive Modeling with Molecular Fingerprint Fusion Strategies

Turkina Viktoriia<sup>1\*</sup>, Messih Melanie R.W.<sup>1</sup>, Kant Etienne<sup>1</sup>,  
Gringhuis Jelle T.<sup>1</sup>, Petrignani Annemieke<sup>1</sup>, Corthals Garry<sup>1</sup>,  
O'Brien Jake W.<sup>1,2</sup>, Samanipour Saer<sup>1,2,3\*</sup>

<sup>1\*</sup>Van 't Hoff Institute for Molecular Sciences (HIMS), University of  
Amsterdam, Amsterdam, 1090 GD, The Netherlands.

<sup>2</sup>Queensland Alliance for Environmental Health Sciences (QAEHS), The  
University of Queensland, 20 Cornwall Street, Woolloongabba, QLD  
4102, Australia.

<sup>3</sup>UvA Data Science Center, University of Amsterdam, Amsterdam, The  
Netherlands.

\*Corresponding author(s). E-mail(s): [v.turkina@uva.nl](mailto:v.turkina@uva.nl);  
[s.samanipour@uva.nl](mailto:s.samanipour@uva.nl);

## Contents

|                                           |            |
|-------------------------------------------|------------|
| <b>S1 Selection of FPs</b>                | <b>S3</b>  |
| <b>S2 Preprocessing summary</b>           | <b>S3</b>  |
| <b>S3 Evaluation Metrics</b>              | <b>S4</b>  |
| <b>S4 Individual FPs on PCA-space</b>     | <b>S4</b>  |
| <b>S5 Fingerprints fusion performance</b> | <b>S11</b> |

## List of Figures

|    |                                                                                                                                                   |     |
|----|---------------------------------------------------------------------------------------------------------------------------------------------------|-----|
| S1 | PCA loadings (a) and scores (b) plots for the KOC dataset using each of the six individual fingerprints and their horizontal concatenation. . .   | S6  |
| S2 | PCA loadings (a) and scores (b) plots for the RIs dataset using each of the six individual fingerprints and their horizontal concatenation. . . . | S7  |
| S3 | PCA loadings (a) and scores (b) plots for the ApisTox dataset using each of the six individual fingerprints and their horizontal concatenation.   | S8  |
| S4 | PCA loadings (a) and scores (b) plots for the BACE dataset using each of the six individual fingerprints and their horizontal concatenation. .    | S9  |
| S5 | PCA loadings (a) and scores (b) plots for the BBBP dataset using each of the six individual fingerprints and their horizontal concatenation. .    | S10 |

## List of Tables

|    |                                                                                                                                                                                                                                   |     |
|----|-----------------------------------------------------------------------------------------------------------------------------------------------------------------------------------------------------------------------------------|-----|
| S1 | Description of selected non-hashed molecular fingerprints employed in this study. . . . .                                                                                                                                         | S3  |
| S2 | Summary of SMILES removal during fingerprint generation. . . . .                                                                                                                                                                  | S4  |
| S3 | Comparison of test set performance between models trained on optimized 95 FP (95% cumulative importance per dataset) and models trained using only the common features of optimized 95 FP shared across all six datasets. . . . . | S11 |

## 1 S1 Selection of FPs

**Table S1:** Description of selected non-hashed molecular fingerprints employed in this study.

| Fingerprint              | Abbreviation | Software | Length | Description                                                                                                                                                                                                                                                                     |
|--------------------------|--------------|----------|--------|---------------------------------------------------------------------------------------------------------------------------------------------------------------------------------------------------------------------------------------------------------------------------------|
| Atom Pair 2D Count       | AP2DC        | PaDEL    | 780    | The count vector of the atom pairs containing specific elements (C, N, O, Cl, I, Br, F, P, S, Si, B, and X representing all halogens) within a maximum distance of 10.                                                                                                          |
| E-state fingerprint      | E-state      | RDKit    | 79     | The count vector encoding electrotopological state (E-state) indices, which incorporate details regarding functional groups, graph topology, and the electronegativity of each atom according to the Kier-Hall method.                                                          |
| Klekotha-Roth Count      | KRC          | PaDEL    | 4860   | The count vector of substructures related to certain bioactivity.                                                                                                                                                                                                               |
| Molecular Access Systems | MACCS        | PaDEL    | 166    | The binary string representing the presence/absence of certain atom types, bond types, atom environments, groups, and properties.                                                                                                                                               |
| PubChem fingerprint      | PubChem      | PaDEL    | 881    | The binary string, covering a wide range of different substructures and features divided into several sections: hierarchic element counts, rings, simple atom pairs, simple atom nearest neighbors, detailed atom neighborhoods, simple SMART patterns, complex SMART patterns. |
| Substructure Keys Count  | SSC          | PaDEL    | 307    | The count vector of SMARTS patterns for functional group classification designed by Christian Laggner.                                                                                                                                                                          |

## 2 S2 Preprocessing summary

**Table S2:** Summary of SMILES removal during fingerprint generation.

| Dataset | Number of SMILES | Removed (FP failure) | Retained | % removed |
|---------|------------------|----------------------|----------|-----------|
| FishTox | 907              | 0                    | 907      | 0.00      |
| KOC     | 824              | 11                   | 813      | 1.33      |
| RIs     | 3018             | 10                   | 3008     | 0.33      |
| ApisTox | 1035             | 0                    | 1035     | 0.00      |
| BBBP    | 2053             | 5                    | 2048     | 0.24      |
| BACE    | 1547             | 0                    | 1547     | 0.00      |

### 3 S3 Evaluation Metrics

4 The regression tasks were evaluated using the root-mean-square error (RMSE) and  
5 coefficient of determination ( $R^2$ ), while classification tasks were assessed using the  
6 area under the receiver operating characteristic curve (ROC-AUC) and the F1-score.  
7 The formulas for each metric are as follows:

8 **Root-Mean-Square Error (RMSE)**

$$\text{RMSE} = \sqrt{\frac{1}{n} \sum_{i=1}^n (y_i - \hat{y}_i)^2} \quad (\text{S1})$$

9 **Coefficient of Determination ( $R^2$ )**

$$R^2 = 1 - \frac{\sum_{i=1}^n (y_i - \hat{y}_i)^2}{\sum_{i=1}^n (y_i - \bar{y})^2} \quad (\text{S2})$$

10 **F1-Score**

$$\text{F1} = 2 \cdot \frac{\text{Precision} \cdot \text{Recall}}{\text{Precision} + \text{Recall}} \quad (\text{S3})$$

11 where

$$\text{Precision} = \frac{TP}{TP + FP}, \quad \text{Recall} = \frac{TP}{TP + FN} \quad (\text{S4})$$

12 **Area Under the ROC Curve (ROC-AUC)**

13 ROC-AUC is computed by plotting the true positive rate (TPR) against the false  
14 positive rate (FPR) at various threshold settings, where TPR and FPR are given by:

$$\text{TPR} = \frac{TP}{TP + FN}, \quad \text{FPR} = \frac{FP}{FP + TN} \quad (\text{S5})$$

### 15 S4 Individual FPs on PCA-space

16 PCA loadings (a) and scores (b) plots for the KOC, RIs, ApisTox, BACE, and BBBP  
17 datasets using each of the six individual fingerprints and their horizontal concatena-  
18 tion. PCA was performed on the combined fingerprint set. In the loadings plots (a),

19 the contributions from each individual fingerprint are shown separately to illustrate  
20 their structural coverage. In the scores plots (b), the projection of the dataset using  
21 each individual fingerprint is visualized in the PCA space derived from the combined  
22 fingerprints (Figure [S1-S5](#))

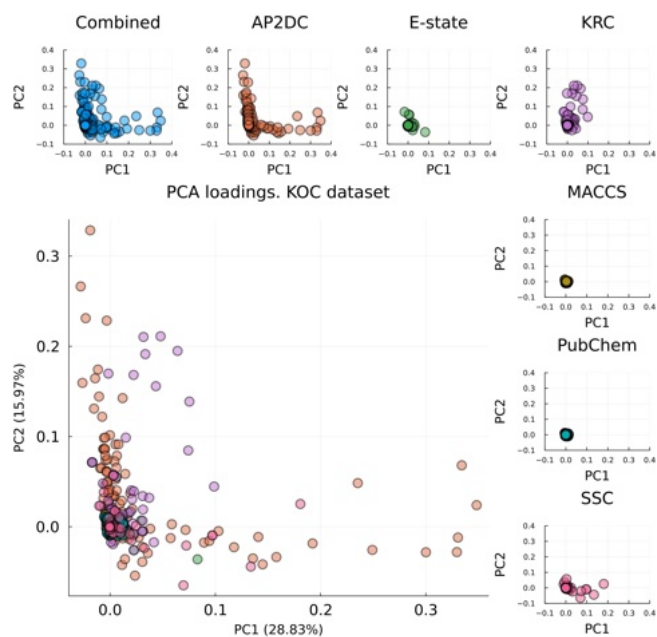

(a)

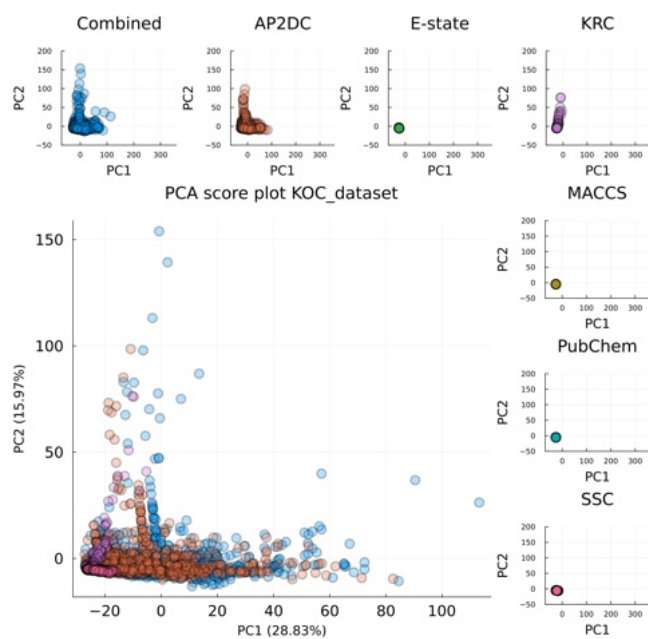

(b)

**Fig. S1:** PCA loadings (a) and scores (b) plots for the KOC dataset using each of the six individual fingerprints and their horizontal concatenation.

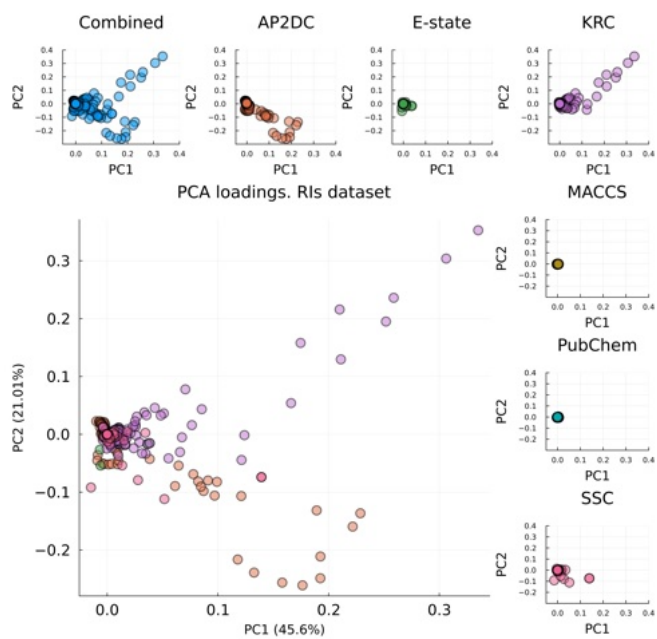

(a)

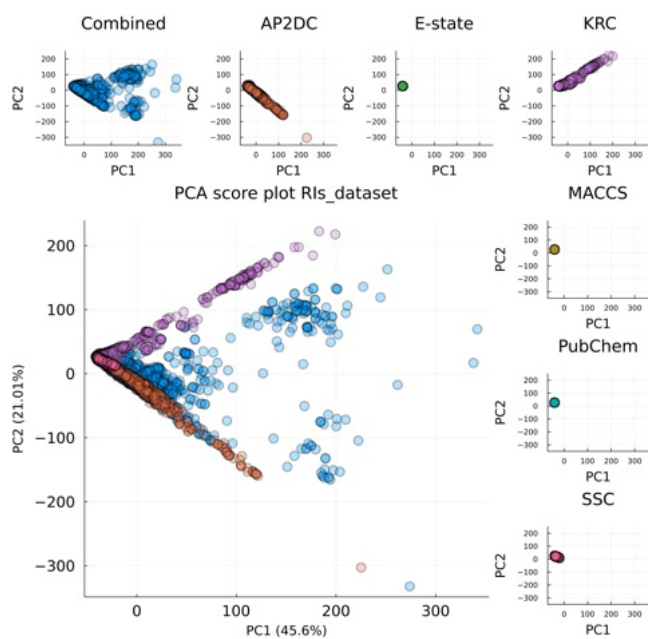

(b)

**Fig. S2:** PCA loadings (a) and scores (b) plots for the RIs dataset using each of the six individual fingerprints and their horizontal concatenation.

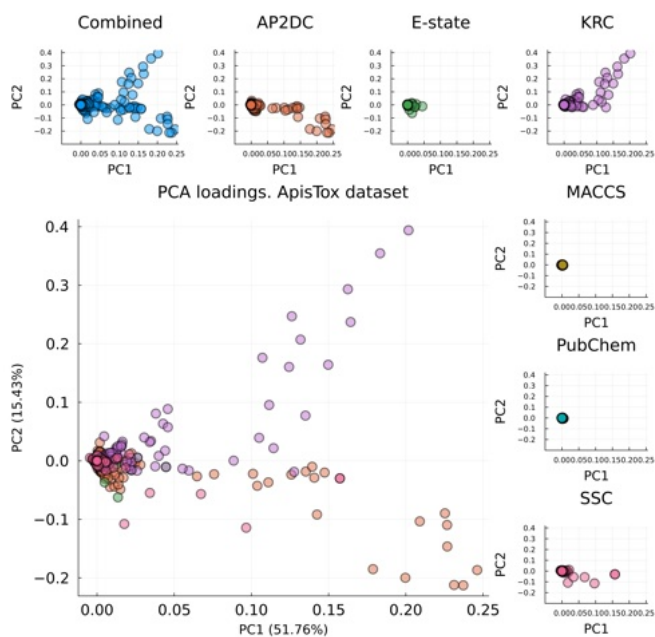

(a)

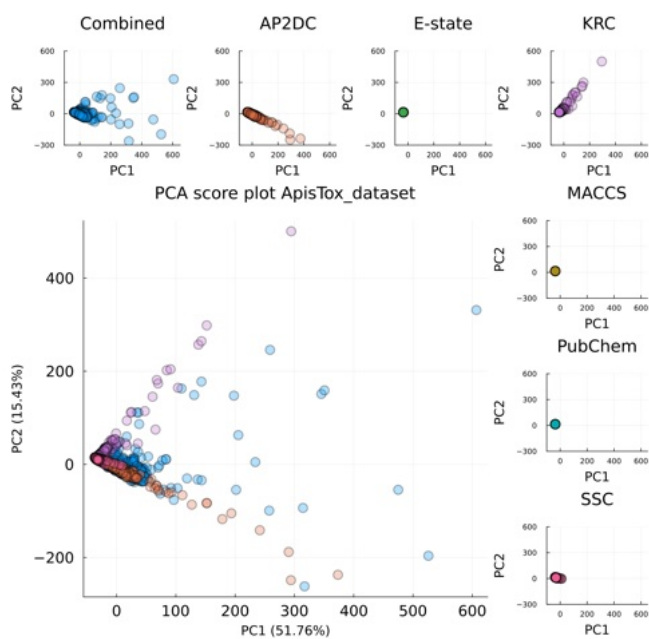

(b)

**Fig. S3:** PCA loadings (a) and scores (b) plots for the ApisTox dataset using each of the six individual fingerprints and their horizontal concatenation.

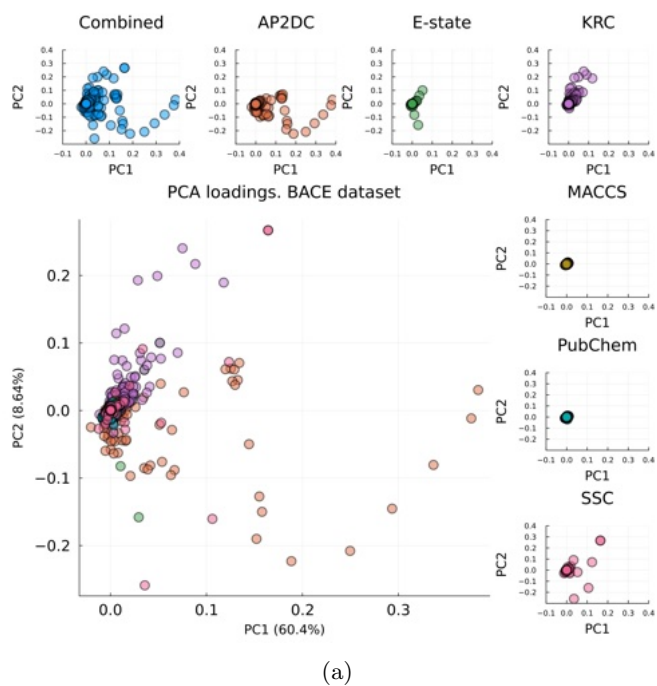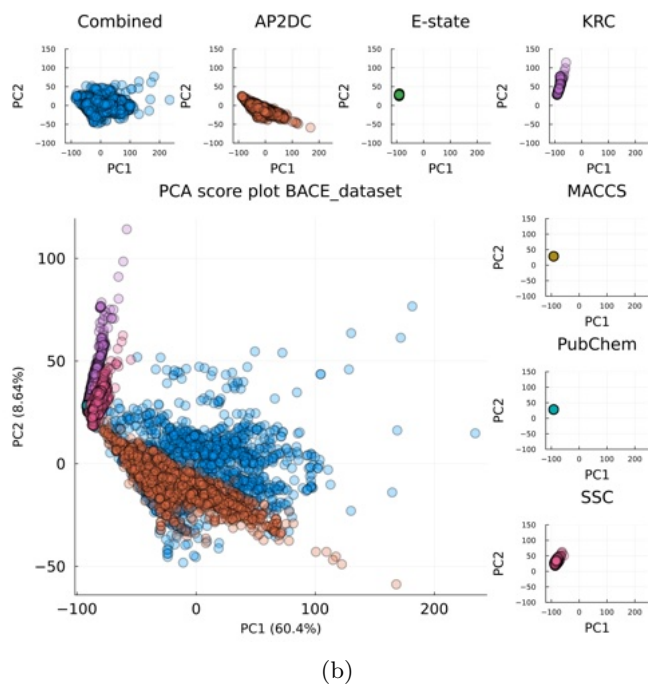

**Fig. S4:** PCA loadings (a) and scores (b) plots for the BACE dataset using each of the six individual fingerprints and their horizontal concatenation.

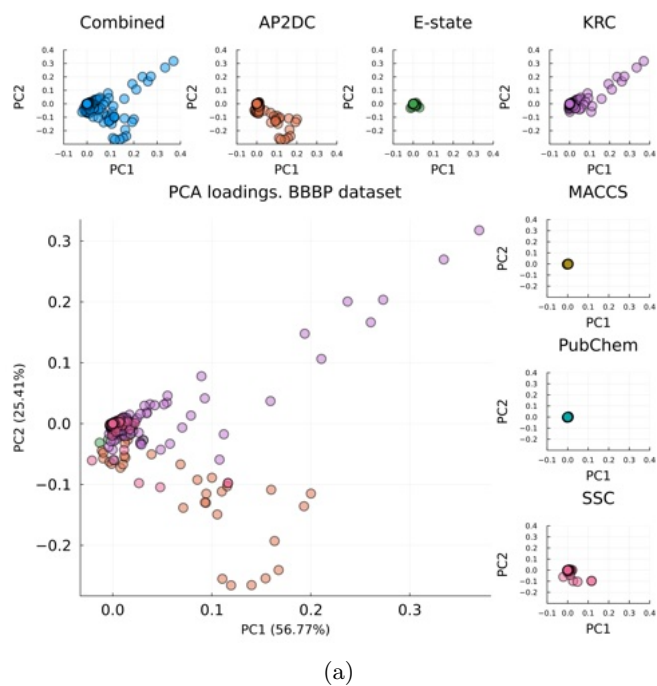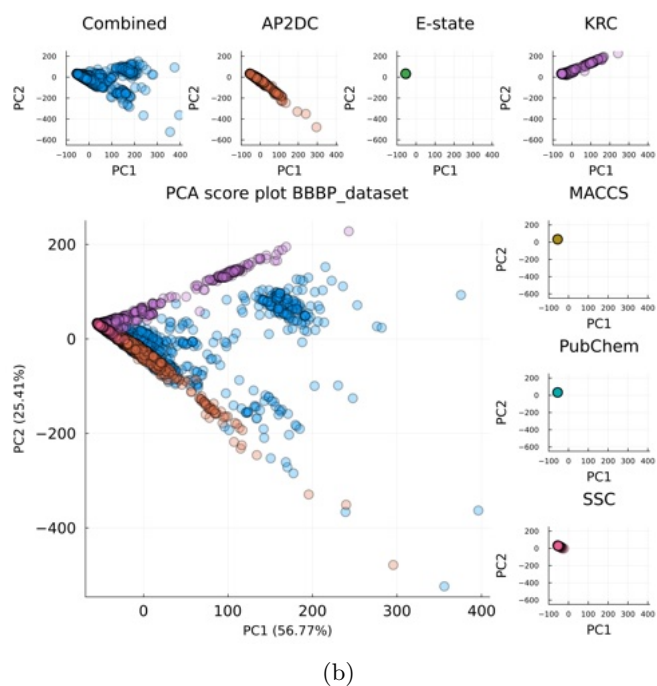

**Fig. S5:** PCA loadings (a) and scores (b) plots for the BBBP dataset using each of the six individual fingerprints and their horizontal concatenation.

23 **S5 Fingerprints fusion performance**

|              | FishTox | KOC   | RIIs  | ApisTox | BACE  | BBBP  |
|--------------|---------|-------|-------|---------|-------|-------|
| Common bits  | 0.587   | 0.811 | 0.785 | 0.696   | 0.869 | 0.939 |
| Optimized 95 | 0.609   | 0.806 | 0.783 | 0.809   | 0.869 | 0.942 |

**Table S3:** Comparison of test set performance between models trained on optimized 95 FP (95% cumulative importance per dataset) and models trained using only the common features of optimized 95 FP shared across all six datasets.
